# Supplementary material for: Concepts for a New Rapid and Simple HPLC Method for Simultaneous Determination of Metoprolol and Meldonium in Pharmaceutical Dosage Forms
Source: MDPI journal article supplement (doi:10.3390/scipharm90040065), 2022-10-17
Supplement: s1 [file s1]

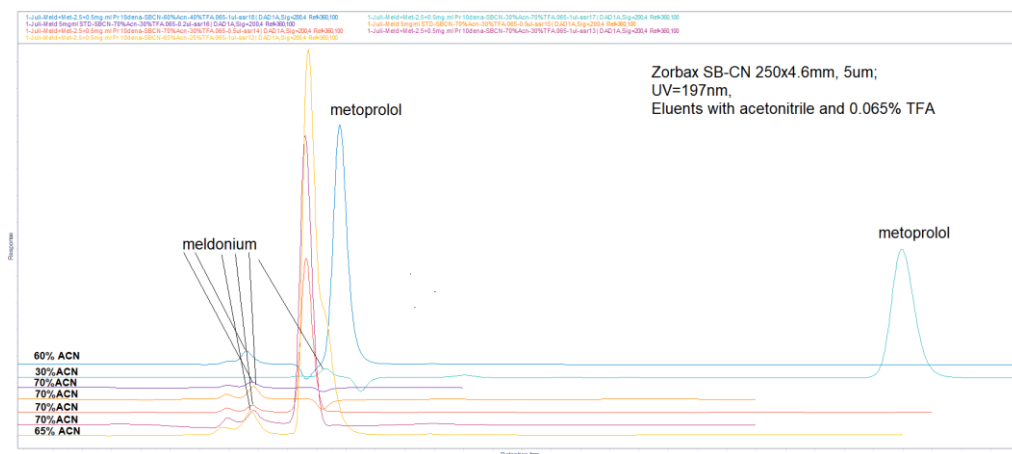

**Suppl. Figure S1.** Testing the chromatograms elution positions and peak shapes of meldonium and metoprolol samples and meldonium standards only, in mobile phases with different procents of ACN and diluted TFA.

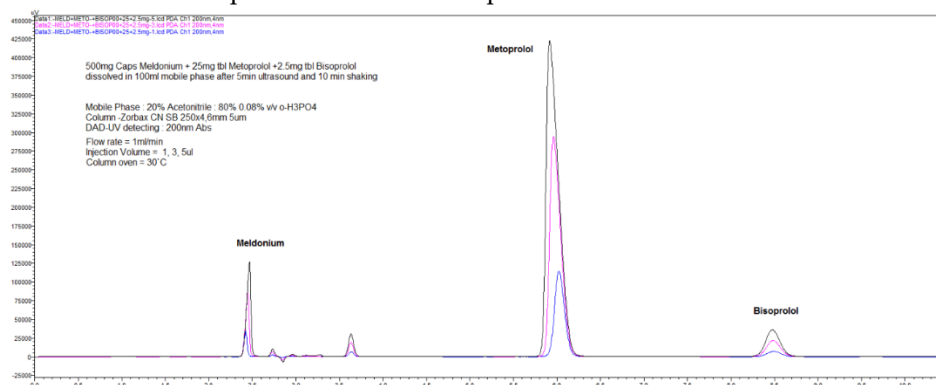

**Suppl. Figure S2.** Chromatogram gained with Zorbax CN-SB column with 3 clearly separated API molecules meldonium, metoprolol and bisoprolol, with their UV-absorption characteristic extracted spectrums on right side, which expand the applicability of method to perform determination of other beta-blocker drugs simultaneously.
