# Supplementary material for: Concepts for a New Rapid and Simple HPLC Method for Simultaneous Determination of Metoprolol and Meldonium in Pharmaceutical Dosage Forms
Source: MDPI journal article supplement (doi:10.3390/scipharm90040065), 2022-10-17
Supplement: s1 [file s1]

Archive with 1 entries (1 files):
- scipharm-1945178-supplementary.pdf
